# Supplementary material for: A facile single crystal to single crystal transition with significant structural contraction on desolvation
Source: Royal Society of Chemistry journal article supplement (doi:10.1039/c4cc06587e), 2014-01-01
Supplement: c4cc06587e1.pdf [file c4cc06587e1.pdf]

# **A facile single crystal to single crystal transition with significant structural contraction on desolvation**

Jane V. Knichal, William J. Gee, Andrew D. Burrows,\* Paul R. Raithby,\* Simon J.  
Teat and Chick C. Wilson\*

*Department of Chemistry  
University of Bath  
Claverton Down, Bath, BA2 7AY*

## **Supporting Information**

\* To whom correspondence should be addressed.

Email: [C.C.Wilson@bath.ac.uk](mailto:C.C.Wilson@bath.ac.uk) Telephone: +44 (0) 1225 386143

## S1: General methods

Starting materials and solvents were purchased from commercial sources and were used without further purification. X-ray diffraction investigations for network **2** were carried out on Station 11.3.1 of The Advanced Light Source (ALS), Lawrence Berkeley National Laboratory.<sup>S1</sup> Data for **1** and **3** were collected on an Agilent Gemini A-Ultra diffractometer<sup>S2</sup> at the University of Bath using Mo-K $\alpha$  radiation, the crystal being cooled by an Agilent Cryojet.<sup>S3</sup>

Powder X-ray diffraction patterns (PXRDs) were recorded on a Bruker AXS D8 Advance diffractometer with copper K $\alpha$  radiation of wavelength 1.5406 Å at 298 K. Samples were placed on a flat plate, and measured with a  $2\theta$  range of 3-60°. The step size was 0.016° with time per step of 134.5 s. Simulated X-ray powder patterns were generated from single crystal data that were imported into PowderCell with a step size of 0.02° and time per step of 1.00 s. Characterisation of each sample was performed using 25 - 50 mg of sample. The transition from **1** to **2** was monitored by dividing a fresh 50 mg sample of **1** in half, and analysing one without air drying, followed by the second, which had been allowed to air dry for 45 minutes and had converted to **2**.

TGA experiments were carried out on a Perkin Elmer TGA 4000 Thermogravimetric Analyser. The samples were heated from 45°C to 600°C at a heating rate of 10°C/min, under a flow of nitrogen (20 mL/min).

Infrared spectra were recorded on a PerkinElmer Spectrum 100 spectrometer equipped with an ATR sampling accessory.

Hot stage microscopy analysis was conducted on complex **1** using a Mettler Toledo FP82 hot stage equipped with a Leica DM1000 microscope. A single crystal of the complex was placed on a glass slide in oil, and heated from 30 °C to a final temperature of 200 °C at a rate of 10 °C per minute.

## S2: PXRD data for **1** – **3**.

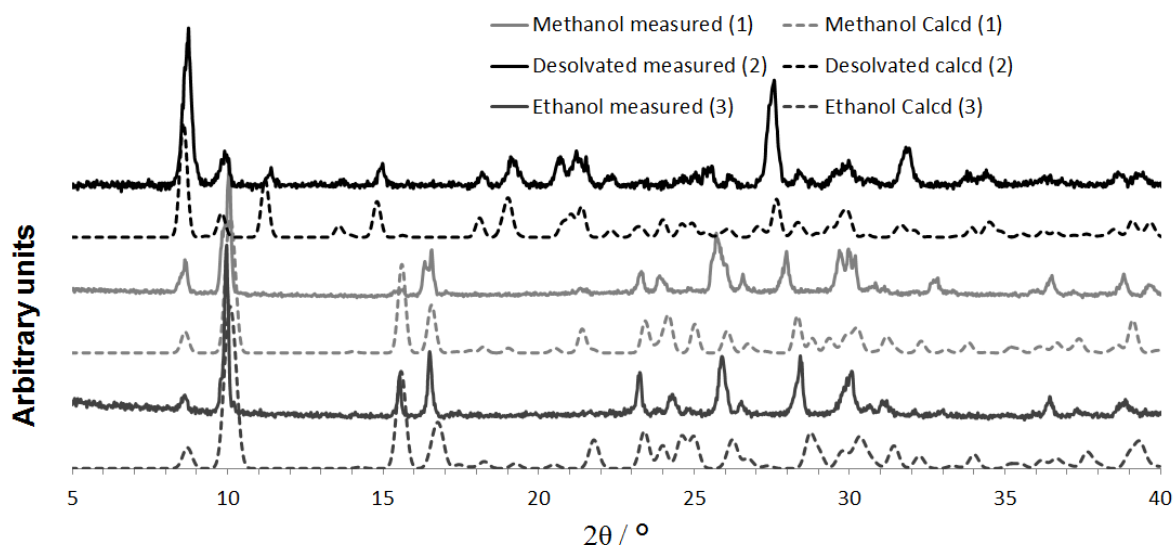

Note: Intermittent variation in peak intensity and location has been attributed to labile interactions between the CP and solvent molecules resulting in localised changes to electron density.

### S3: Rapid heating of crystalline 1.

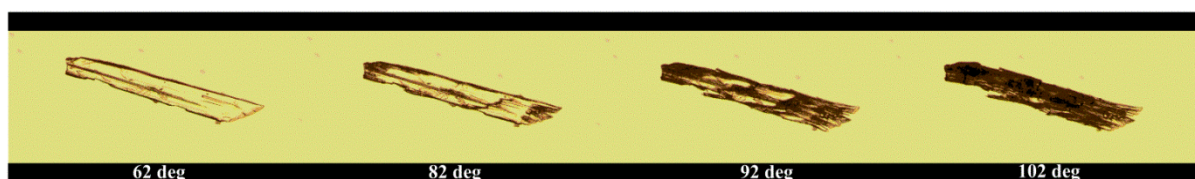

Rapid heating of a single crystal sample of **1** yielded microcrystalline particles. Rate of heating: 10 °C per minute. PXRD analysis of the degraded crystal was found to match the simulated pattern of crystalline **2**.

### S4: Crystallographic data for 1 – 3.

Single crystal X-ray data was collected on an Agilent Gemini A-Ultra diffractometer equipped with a Cryojet crystal cooling apparatus. The structures were solved by direct methods and refined by full-matrix least-squares on  $F^2$ . Details of treatment of disorder *etc* are included in the cif files.

**Table 1.** Crystallographic Data for **1** and **2**.

|                                          | <b>1</b>                                                        | <b>2</b>                                                      | <b>3</b>                                                        |
|------------------------------------------|-----------------------------------------------------------------|---------------------------------------------------------------|-----------------------------------------------------------------|
| formula                                  | C <sub>22</sub> H <sub>18</sub> O <sub>11</sub> Pb <sub>2</sub> | C <sub>20</sub> H <sub>8</sub> O <sub>8</sub> Pb <sub>2</sub> | C <sub>44</sub> H <sub>30</sub> O <sub>19</sub> Pb <sub>4</sub> |
| formula weight                           | 872.74                                                          | 790.64                                                        | 1691.44                                                         |
| crystal system                           | monoclinic                                                      | triclinic                                                     | monoclinic                                                      |
| space group                              | <i>I</i> 2/a                                                    | $\bar{P}1$                                                    | <i>I</i> 2                                                      |
| a, Å                                     | 10.037(2)                                                       | 9.3790(4)                                                     | 9.988(2)                                                        |
| b, Å                                     | 17.698(4)                                                       | 10.0130(3)                                                    | 17.698(4)                                                       |
| c, Å                                     | 12.687(3)                                                       | 10.3180(4)                                                    | 12.489(3)                                                       |
| $\alpha$ , °                             | 90                                                              | 100.148(3)                                                    | 90                                                              |
| $\beta$ , °                              | 96.75(3)                                                        | 91.407(3)                                                     | 95.59(3)                                                        |
| $\gamma$ , °                             | 90                                                              | 107.941(3)                                                    | 90                                                              |
| V, Å <sup>3</sup>                        | 2238.1(8)                                                       | 904.22(6)                                                     | 2197.1(8)                                                       |
| Z                                        | 4                                                               | 2                                                             | 2                                                               |
| $\rho_{\text{calc}}$ , g/cm <sup>3</sup> | 2.590                                                           | 2.904                                                         | 2.557                                                           |
| reflns measured                          | 6767                                                            | 13225                                                         | 24817                                                           |
| unique reflections                       | 2606                                                            | 5621                                                          | 5531                                                            |
| no. obsd ( $I > 2\sigma(I)$ )            | 2043                                                            | 3486                                                          | 4802                                                            |
| $R_1$                                    | 0.0406                                                          | 0.0505                                                        | 0.0479                                                          |
| $wR_2$                                   | 0.0875                                                          | 0.1064                                                        | 0.0846                                                          |
| GOF                                      | 1.008                                                           | 1.016                                                         | 1.031                                                           |
| temp, K                                  | 100(2)                                                          | 100(2)                                                        | 149.9(2)                                                        |

### S5: Selected bond lengths and angles 1 – 3.

#### Bond lengths and angles for 1.

| Bond lengths (Å)    |           |                   |            |
|---------------------|-----------|-------------------|------------|
| Pb(1)-O(1)          | 2.416(6)  | Pb(1)-O(5)        | 2.647(8)   |
| Pb(1)-O(3)#1        | 2.439(5)  | O(4)-Pb(1)#3      | 2.520(6)   |
| Pb(1)-O(4)#2        | 2.520(6)  | O(3)-Pb(1)#1      | 2.439(5)   |
| Pb(1)-O(2)          | 2.529(6)  |                   |            |
| Bond angles (°)     |           |                   |            |
| O(1)-Pb(1)-O(3)#1   | 82.98(19) | O(4)#2-Pb(1)-O(2) | 126.31(18) |
| O(1)-Pb(1)-O(4)#2   | 74.4(2)   | O(1)-Pb(1)-O(5)   | 132.3(2)   |
| O(3)#1-Pb(1)-O(4)#2 | 85.30(18) | O(3)#1-Pb(1)-O(5) | 83.0(2)    |

|                   |           |                   |          |
|-------------------|-----------|-------------------|----------|
| O(1)-Pb(1)-O(2)   | 52.67(18) | O(4)#2-Pb(1)-O(5) | 148.6(2) |
| O(3)#1-Pb(1)-O(2) | 80.40(19) | O(2)-Pb(1)-O(5)   | 80.1(2)  |

Symmetry transformations used to generate equivalent atoms:

#1 -x+1/2,y,-z+1 #2 x+1,y,z #3 x-1,y,z

**Bond lengths and angles for 2.**

|                     |          |                    |          |
|---------------------|----------|--------------------|----------|
| Bond lengths (Å)    |          |                    |          |
| Pb(1)-O(7)          | 2.414(8) | Pb(2)-O(5)         | 2.330(8) |
| Pb(1)-O(1)          | 2.448(7) | Pb(2)-O(3)         | 2.407(8) |
| Pb(1)-O(4)#1        | 2.461(7) | Pb(2)-O(6)         | 2.639(8) |
| Pb(1)-O(2)          | 2.506(7) | O(4)-Pb(1)#3       | 2.461(7) |
| Pb(1)-O(1)#2        | 2.719(8) | O(8)-Pb(2)#1       | 2.410(7) |
| Bond angles (°)     |          |                    |          |
| O(7)-Pb(1)-O(1)     | 86.9(3)  | O(2)-Pb(1)-O(1)#2  | 101.2(2) |
| O(7)-Pb(1)-O(4)#1   | 80.5(3)  | Pb(1)-O(1)-Pb(1)#2 | 110.5(3) |
| O(1)-Pb(1)-O(4)#1   | 73.8(2)  | O(5)-Pb(2)-O(3)    | 80.5(3)  |
| O(7)-Pb(1)-O(2)     | 80.6(3)  | O(5)-Pb(2)-O(8)#3  | 76.1(2)  |
| O(1)-Pb(1)-O(2)     | 53.3(2)  | O(3)-Pb(2)-O(8)#3  | 88.8(3)  |
| O(4)#1-Pb(1)-O(2)   | 124.4(2) | O(5)-Pb(2)-O(6)    | 52.0(2)  |
| O(7)-Pb(1)-O(1)#2   | 147.3(2) | O(3)-Pb(2)-O(6)    | 78.5(3)  |
| O(1)-Pb(1)-O(1)#2   | 69.5(3)  | O(8)#3-Pb(2)-O(6)  | 127.8(3) |
| O(4)#1-Pb(1)-O(1)#2 | 71.5(3)  |                    |          |

Symmetry transformations used to generate equivalent atoms:

#1 x,y-1,z #2 -x+2,-y+1,-z #3 x,y+1,z

**Bond lengths and angles for 3.**

|                     |           |                     |           |
|---------------------|-----------|---------------------|-----------|
| Bond lengths (Å)    |           |                     |           |
| Pb(2)-O(7)          | 2.321(11) | Pb(1)-O(4)#4        | 2.601(11) |
| Pb(2)-O(5)#1        | 2.384(10) | Pb(1)-O(9)          | 2.641(5)  |
| Pb(2)-O(6)#2        | 2.483(7)  | Pb(1)-O(5)          | 2.861(9)  |
| Pb(2)-O(8)          | 2.565(7)  | O(4)-Pb(1)#1        | 2.601(11) |
| Pb(2)-O(4)          | 2.623(10) | O(5)-Pb(2)#4        | 2.384(10) |
| Pb(1)-O(3)#3        | 2.414(7)  | O(6)-Pb(2)#2        | 2.483(7)  |
| Pb(1)-O(1)          | 2.427(10) | O(3)-Pb(1)#3        | 2.414(7)  |
| Pb(1)-O(2)          | 2.451(8)  | Pb(1)-O(4)#4        | 2.601(11) |
| Bond angles (°)     |           |                     |           |
| O(7)-Pb(2)-O(5)#1   | 76.8(4)   | O(3)#3-Pb(1)-O(4)#4 | 84.3(3)   |
| O(7)-Pb(2)-O(6)#2   | 82.4(3)   | O(1)-Pb(1)-O(4)#4   | 71.2(4)   |
| O(5)#1-Pb(2)-O(6)#2 | 86.2(3)   | O(2)-Pb(1)-O(4)#4   | 125.3(3)  |
| O(7)-Pb(2)-O(8)     | 52.0(4)   | O(3)#3-Pb(1)-O(9)   | 78.4(2)   |
| O(5)#1-Pb(2)-O(8)   | 127.7(4)  | O(1)-Pb(1)-O(9)     | 131.3(2)  |
| O(6)#2-Pb(2)-O(8)   | 78.1(2)   | O(2)-Pb(1)-O(9)     | 78.6(3)   |
| O(7)-Pb(2)-O(4)     | 76.3(3)   | O(4)#4-Pb(1)-O(9)   | 148.5(3)  |
| O(5)#1-Pb(2)-O(4)   | 75.5(3)   | O(3)#3-Pb(1)-O(5)   | 147.6(3)  |
| O(6)#2-Pb(2)-O(4)   | 154.4(3)  | O(1)-Pb(1)-O(5)     | 72.3(3)   |
| O(8)-Pb(2)-O(4)     | 99.0(3)   | O(2)-Pb(1)-O(5)     | 98.9(3)   |
| O(3)#3-Pb(1)-O(1)   | 83.1(3)   | O(4)#4-Pb(1)-O(5)   | 68.2(3)   |
| O(3)#3-Pb(1)-O(2)   | 82.9(3)   | O(9)-Pb(1)-O(5)     | 133.8(3)  |
| O(1)-Pb(1)-O(2)     | 54.5(3)   | Pb(1)#1-O(4)-Pb(2)  | 108.6(4)  |

Symmetry transformations used to generate equivalent atoms: #1 x-1,y,z

#2 -x+1,y,-z+2 #3 -x+1,y,-z+1 #4 x+1,y,z

## S6: Expanded Figure 4.

### Expanded 1:

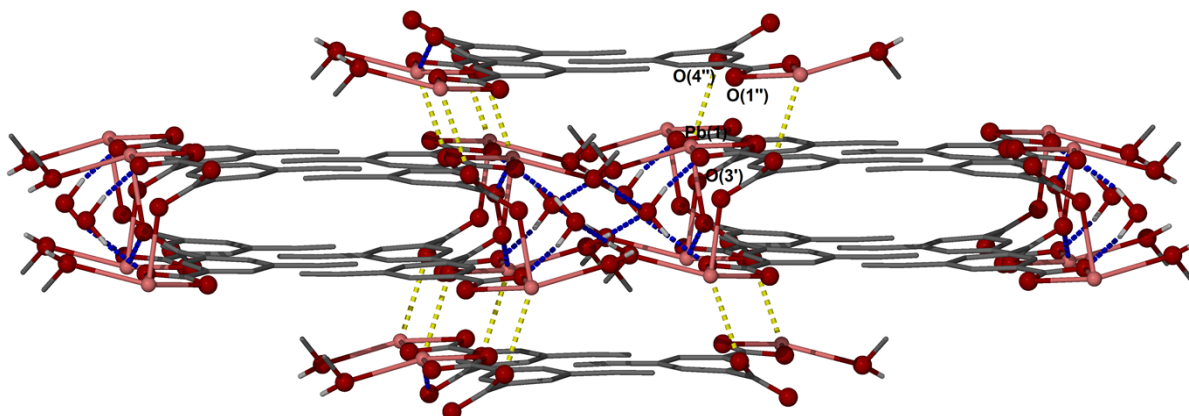

More detailed view of the interactions between chains of **1**. Initially, hydrogen bonding dominates with two secondary interactions between Pb(1)-O(3') and Pb(1)-O(4''), with O(1'') labelled to show the slip between chains when solvents are eliminated to form **2**.

### Enlarged Metal Coordination Region:

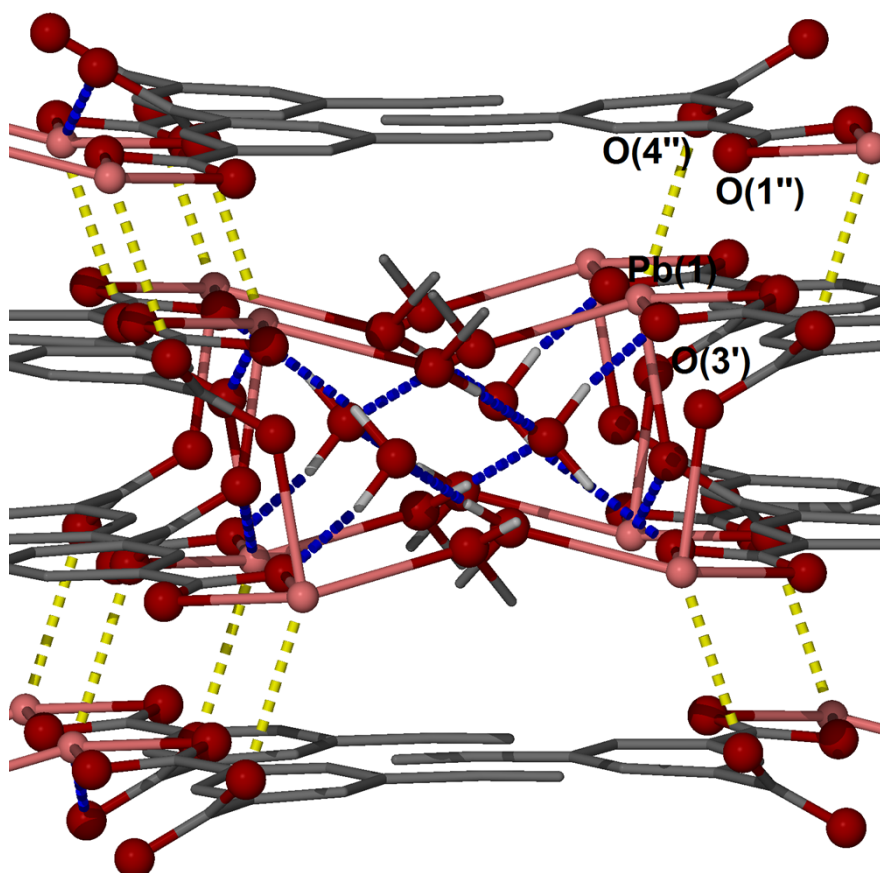

Here the coordination environment of the lead(II) in **1** is shown in greater clarity.

### Expanded 2:

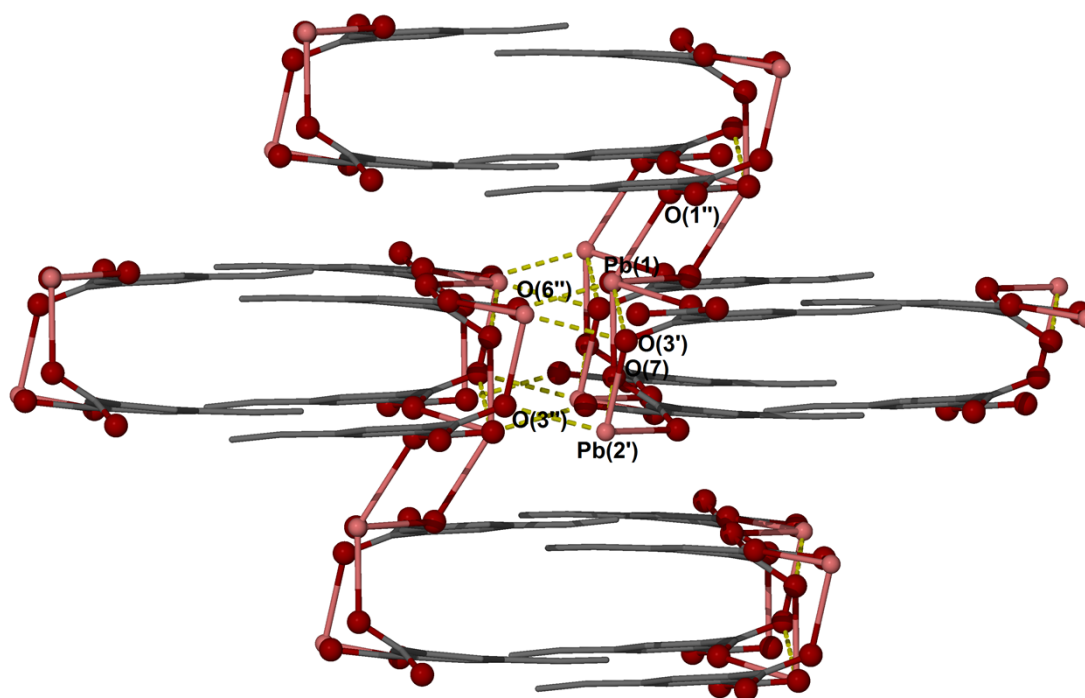

Conversion to **2** sees a primary Pb(1)-O(1'') bond form by slipping of the chains. Lost hydrogen bonds are replaced by secondary interactions between Pb(1) and O(6'') and Pb(2') and O(3'').

### Enlarged Metal Coordination Region:

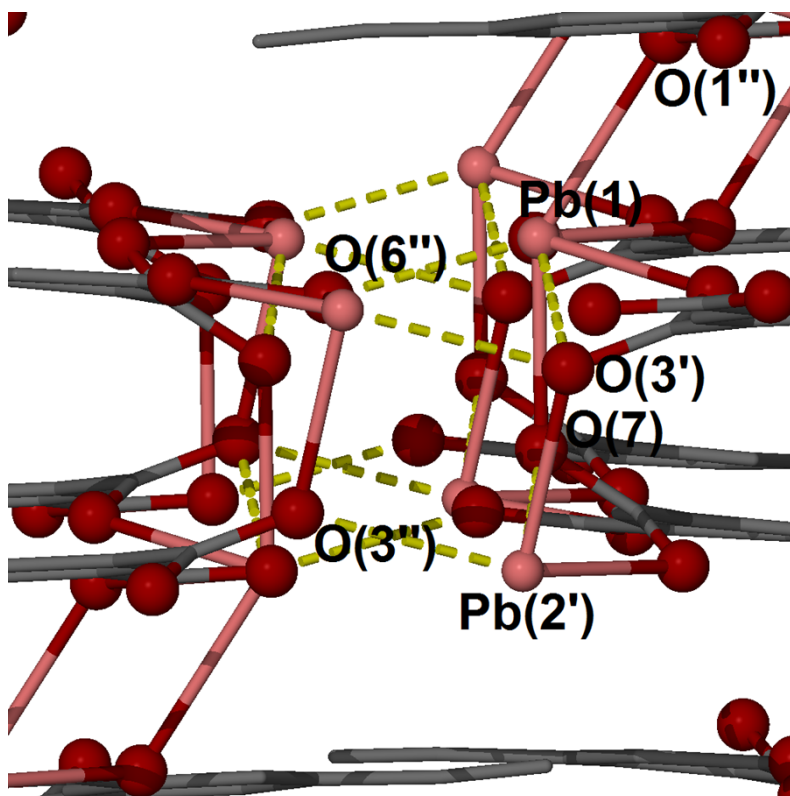

Here the coordination environment of the lead(II) centres in **2** are shown in greater clarity.

### S7: TGA analysis of **1**.

Thermogravimetric analysis was used to better understand the desolvation behaviour of **1**. A fresh, methanol moistened sample was placed on the balance under a constant stream of nitrogen and the loss of weight monitored. After approximately 34 minutes 90% of the solvent mass had been lost, and 99% solvent loss was observed after 48 minutes. Monitoring was continued for 14 hours to allow the sample weight to completely equilibrate. After this time the converted sample of **2** was heated to 600 °C, whereupon the sample degraded to lead(II) oxide in a two-step process beginning at 200 °C and reaching completion at 480 °C (observed mass loss: 45%, predicted mass loss: 44%).

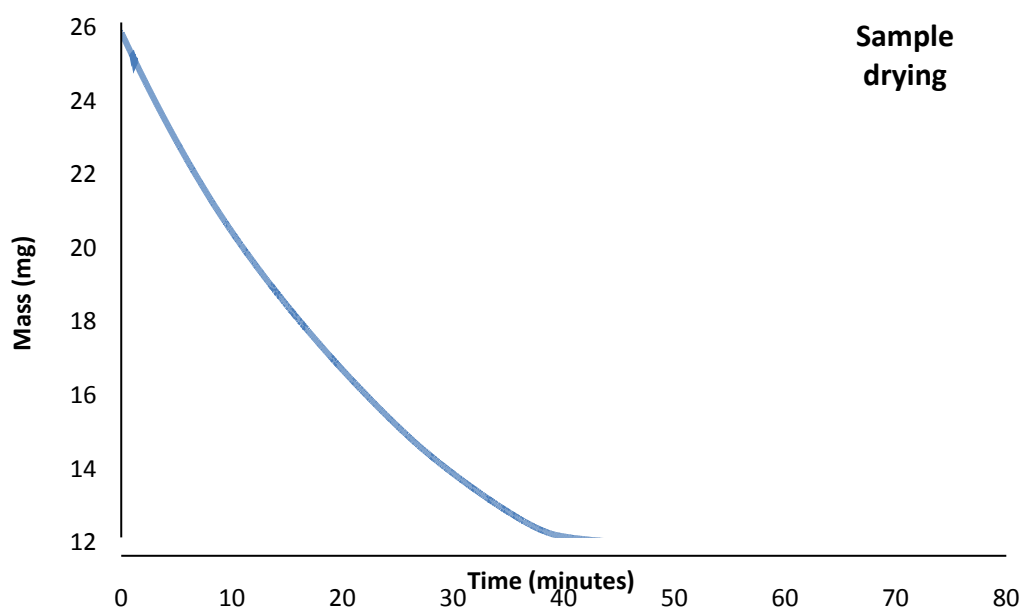

Pre-drying of a solvated sample of **1** freshly removed from mother-liquor on the TGA balance under a stream of nitrogen at ambient temperature.

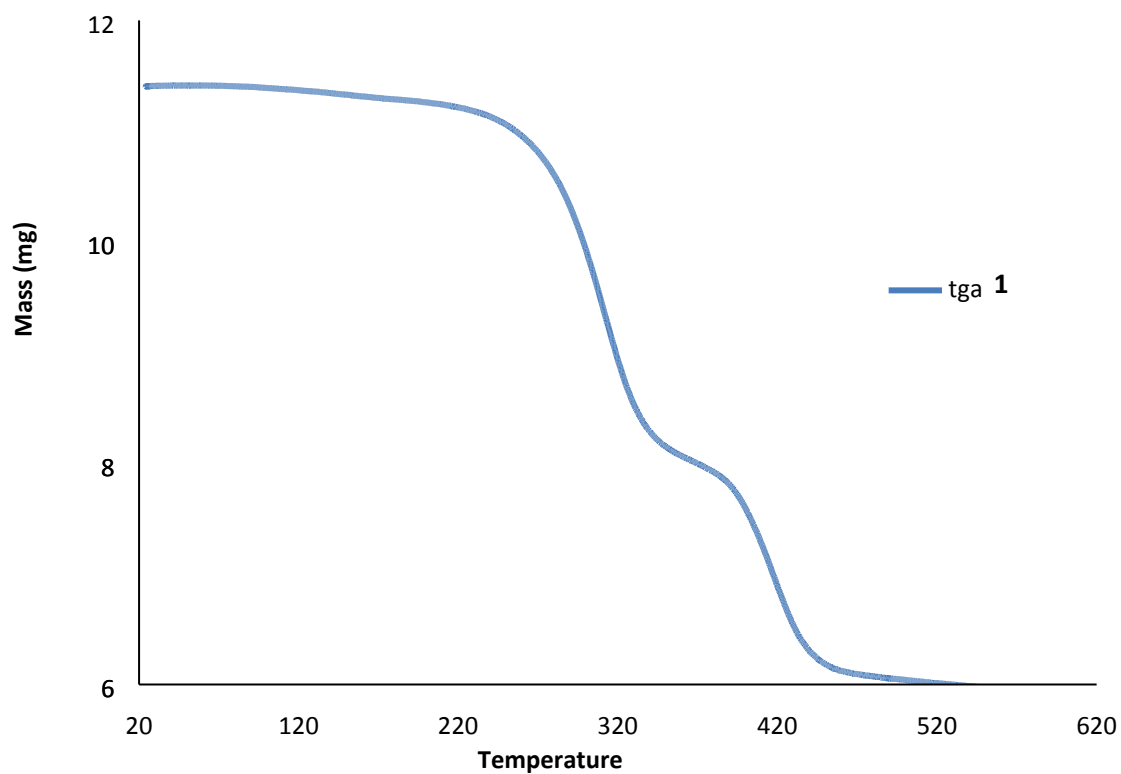

TGA analysis of **1** once a steady weight was attained post-drying

#### S8: References:

S1: Station13.3.1, The Advanced Light Source. [www.als.lbl.gov/als/techspecs/bl11.3.1.html](http://www.als.lbl.gov/als/techspecs/bl11.3.1.html).

S2: Agilent Gemini A-Ultra Diffractometer <http://www.chem.agilent.com/en-US/Products/Instruments/x-raycrystallography/smallmoleculesystem/geminiultra/pages/default.aspx>

S3: Agilent CryojetXL <http://www.chem.agilent.com/en-US/Products/Instruments/x-raycrystallography/accessories/cryojetxl/pages/default.aspx>
